# Supplementary material for: Serum levels of bone sialoprotein correlate with portal pressure in patients with liver cirrhosis
Source: PubMed Central journal article supplement (PMC7164617; doi:10.1371/journal.pone.0231701), 2020-04-17

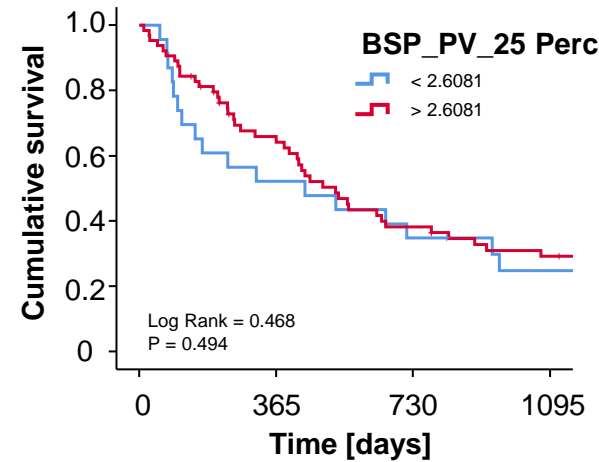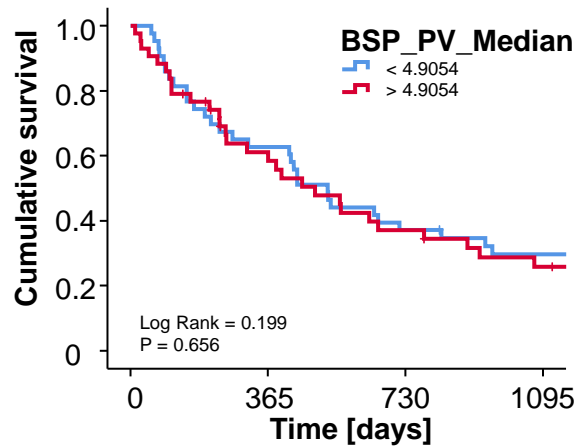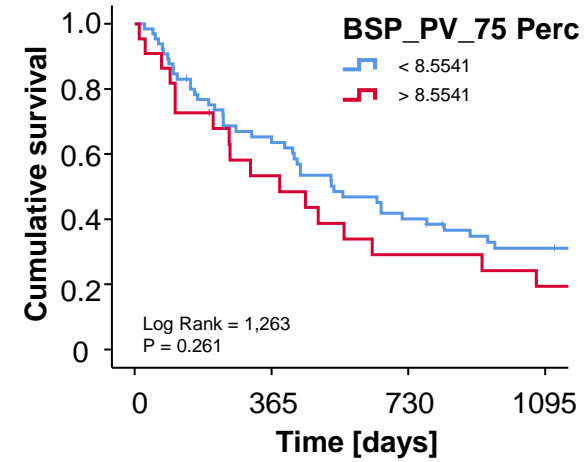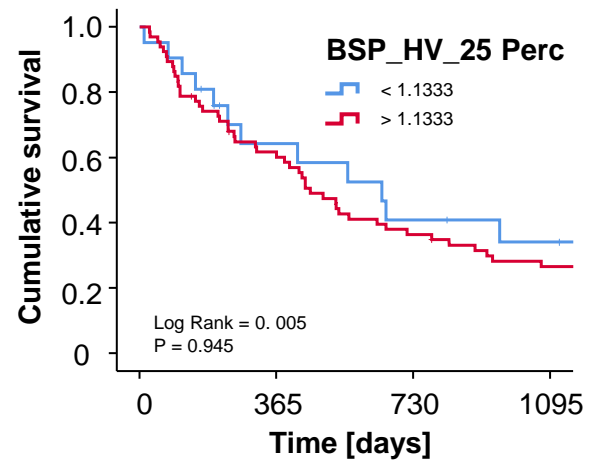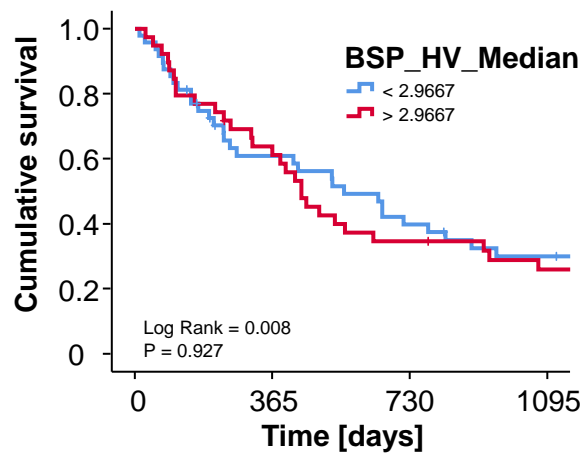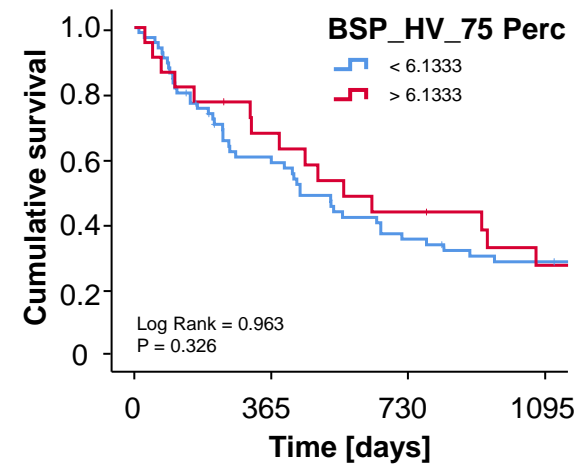

Supplement: pone.0231701.s003.pdf [file pone.0231701.s003.pdf]
